# Supplementary material for: Chromatin alterations during the epididymal maturation of mouse sperm refine the paternally inherited epigenome
Source: PubMed Central journal article supplement (PMC8734183; doi:10.1186/s13072-021-00433-4), 2022-01-06
Supplement: 13072_2021_433_MOESM2_ESM.pdf [file 13072_2021_433_MOESM2_ESM.pdf]

### Supplemental Figure 1.

Genomic distribution (top) and top 25 Go Pathways (below) for Cluster 1 CpG Islands that display an increase in novel H3K9me2 enrichment within cauda-derived sperm.

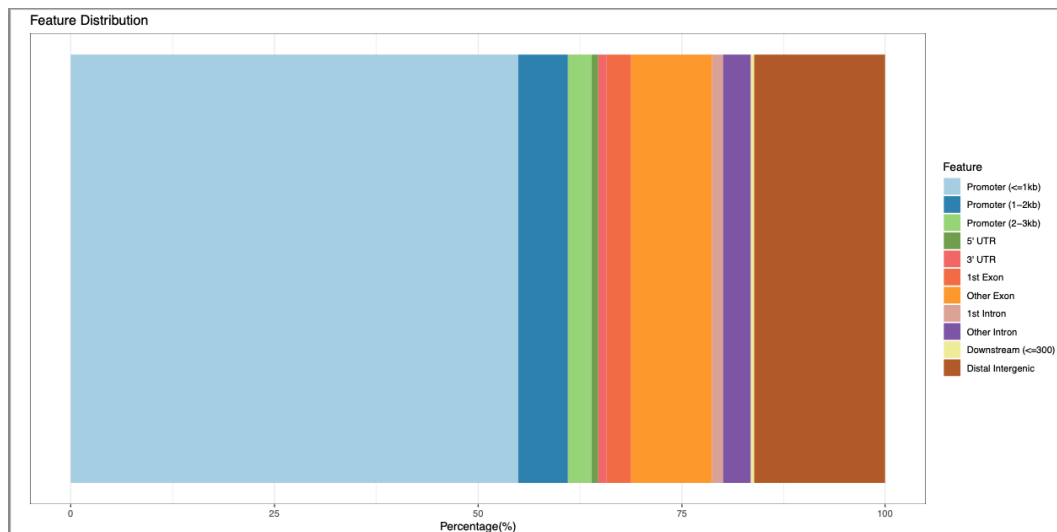

Analysis Type:

Annotation Version and Release Date:

Analyzed List:

Reference List:

Test Type:

Correction:

PANTHER Overrepresentation Test (Released 20210224)

GO Ontology database DOI: 10.5281/zenodo.4735677 Released 2021-05-01  
upload\_1 (Mus musculus)

Mus musculus (all genes in database)

FISHER

FDR

| GO biological process complete | Mus musculus - REFLIST (21988) | # | expected | +/- | Fold Enrichment | raw P value | FDR      |
|--------------------------------|--------------------------------|---|----------|-----|-----------------|-------------|----------|
| chiasma assembly (GO:0051026)  | 7                              | 4 | 0.15     | +   | 26.18           | 6.03E-05    | 1.38E-02 |

|                                                                                               |     |    |      |   |       |          |          |
|-----------------------------------------------------------------------------------------------|-----|----|------|---|-------|----------|----------|
| cell cycle phase (GO:0022403)                                                                 | 21  | 6  | 0.46 | + | 13.09 | 1.86E-05 | 6.12E-03 |
| synaptonemal complex assembly (GO:0007130)                                                    | 24  | 6  | 0.52 | + | 11.45 | 3.54E-05 | 8.72E-03 |
| synaptonemal complex organization (GO:0070193)                                                | 27  | 6  | 0.59 | + | 10.18 | 6.25E-05 | 1.41E-02 |
| calcium-dependent cell-cell adhesion via plasma membrane cell adhesion molecules (GO:0016339) | 34  | 7  | 0.74 | + | 9.43  | 2.33E-05 | 6.45E-03 |
| biological phase (GO:0044848)                                                                 | 38  | 7  | 0.83 | + | 8.44  | 4.37E-05 | 1.04E-02 |
| homologous chromosome pairing at meiosis (GO:0007129)                                         | 57  | 10 | 1.24 | + | 8.04  | 1.50E-06 | 1.13E-03 |
| homologous chromosome segregation (GO:0045143)                                                | 71  | 11 | 1.55 | + | 7.1   | 1.35E-06 | 1.12E-03 |
| chromosome organization involved in meiotic cell cycle (GO:0070192)                           | 80  | 11 | 1.75 | + | 6.3   | 3.83E-06 | 2.02E-03 |
| synapse assembly (GO:0007416)                                                                 | 86  | 11 | 1.88 | + | 5.86  | 7.18E-06 | 3.15E-03 |
| positive regulation of synapse assembly (GO:0051965)                                          | 80  | 10 | 1.75 | + | 5.73  | 2.24E-05 | 6.79E-03 |
| meiosis I (GO:0007127)                                                                        | 125 | 15 | 2.73 | + | 5.5   | 3.37E-07 | 4.83E-04 |
| homophilic cell adhesion via plasma membrane adhesion molecules (GO:0007156)                  | 109 | 13 | 2.38 | + | 5.46  | 2.17E-06 | 1.49E-03 |
| meiosis I cell cycle process (GO:0061982)                                                     | 127 | 15 | 2.77 | + | 5.41  | 4.05E-07 | 5.33E-04 |
| meiotic chromosome segregation (GO:0045132)                                                   | 100 | 11 | 2.18 | + | 5.04  | 2.62E-05 | 6.76E-03 |
| multicellular organismal response to stress (GO:0033555)                                      | 94  | 10 | 2.05 | + | 4.87  | 7.84E-05 | 1.72E-02 |
| cell-cell adhesion via plasma-membrane adhesion molecules (GO:0098742)                        | 190 | 19 | 4.15 | + | 4.58  | 1.31E-07 | 2.30E-04 |
| regulation of synapse assembly (GO:0051963)                                                   | 121 | 12 | 2.64 | + | 4.54  | 2.92E-05 | 7.43E-03 |

|                                                            |     |    |      |   |      |          |          |
|------------------------------------------------------------|-----|----|------|---|------|----------|----------|
| positive regulation of cell junction assembly (GO:1901890) | 123 | 12 | 2.69 | + | 4.47 | 3.39E-05 | 8.49E-03 |
| meiotic nuclear division (GO:0140013)                      | 169 | 16 | 3.69 | + | 4.34 | 2.48E-06 | 1.50E-03 |
| meiotic cell cycle process (GO:1903046)                    | 185 | 16 | 4.04 | + | 3.96 | 7.23E-06 | 3.08E-03 |
| central nervous system neuron differentiation (GO:0021953) | 215 | 17 | 4.69 | + | 3.62 | 1.13E-05 | 4.15E-03 |
| regulation of synapse organization (GO:0050807)            | 261 | 19 | 5.7  | + | 3.33 | 1.05E-05 | 3.95E-03 |
| cell junction assembly (GO:0034329)                        | 249 | 18 | 5.44 | + | 3.31 | 1.95E-05 | 6.16E-03 |
| nuclear chromosome segregation (GO:0098813)                | 212 | 15 | 4.63 | + | 3.24 | 1.19E-04 | 2.46E-02 |
| meiotic cell cycle (GO:0051321)                            | 299 | 21 | 6.53 | + | 3.22 | 6.11E-06 | 2.83E-03 |

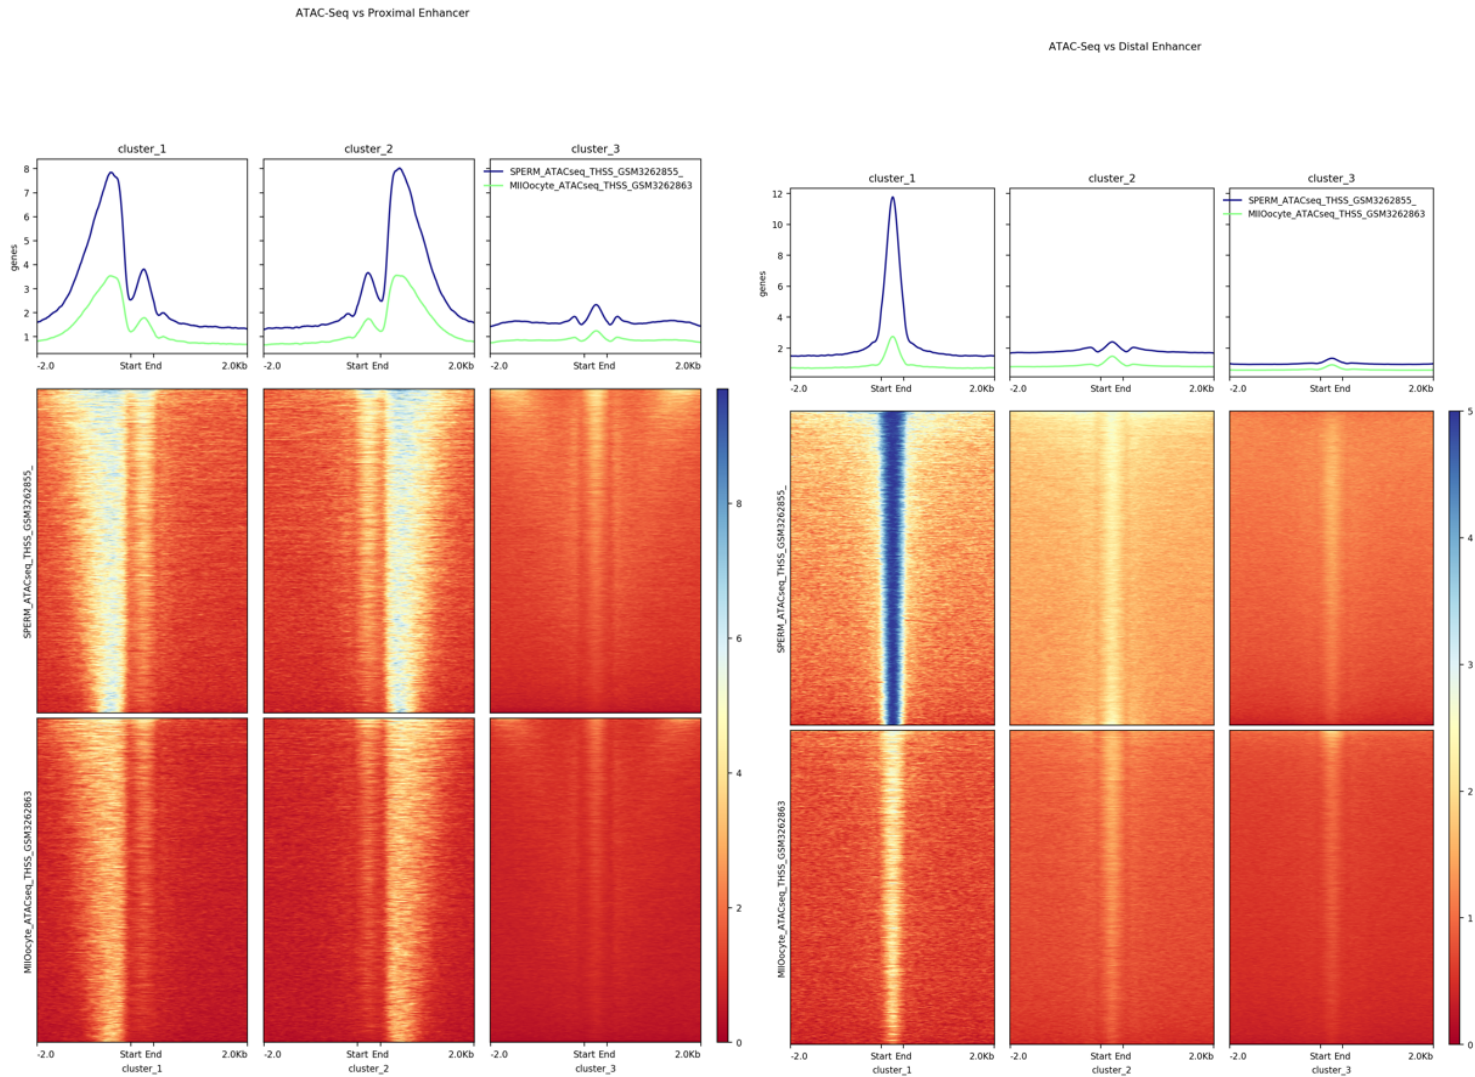

**Supplemental Figure 2A. ATAC-sequencing profiles compared to Distal and Proximal Enhancers.** Using deepTool2, we compared Tn5 transposase hypersensitive sites identified in MII oocytes and caudal sperm (Geo: GSE116854) to distal and proximal enhancer-like sequences identified by the ENCODE consortium (37).

**Supplemental Figure 2B.** Genomic distribution (top) and top 25 Go Pathways (below) for Cluster 1, Enhancer-Like Sequences exhibiting increased H3K9me2 enrichment in cauda-derived sperm.

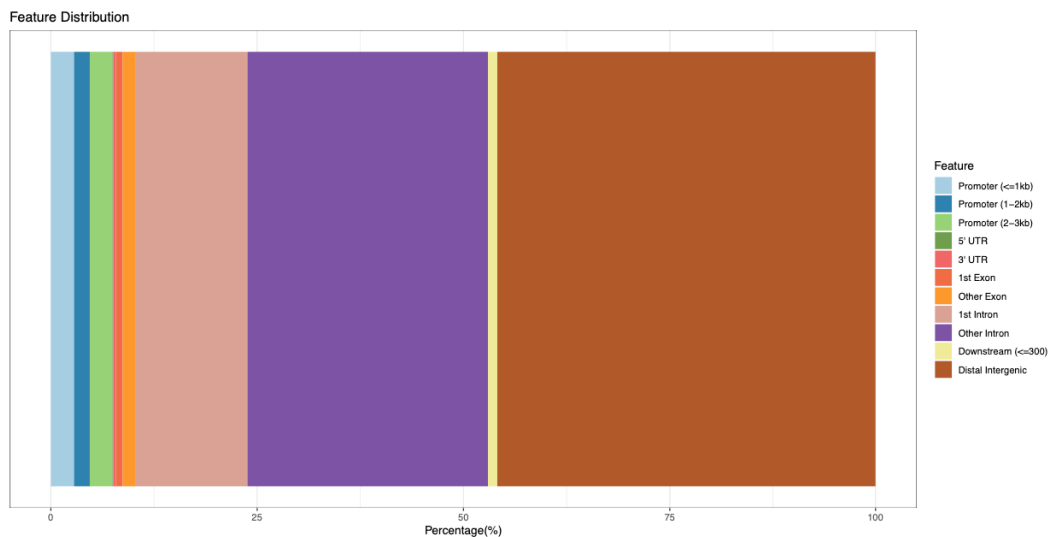

Analysis Type:

PANTHER Overrepresentation Test (Released 20210224)

Annotation Version and Release Date:

GO Ontology database DOI: 10.5281/zenodo.4735677 Released 2021-05-01

Analyzed List:

upload\_1 (Mus musculus)

Reference List:

Mus musculus (all genes in database)

Test Type:

FISHER

Correction:

FDR

| GO biological process complete                              | Mus musculus - REFLIST (21988) | 2334 | expected | over/under | fold Enrichment | raw P-value | FDR      |
|-------------------------------------------------------------|--------------------------------|------|----------|------------|-----------------|-------------|----------|
| regulation of multicellular organismal process (GO:0051239) | 2813                           | 462  | 298.6    | +          | 1.55            | 2.90E-19    | 4.57E-15 |
| cell adhesion (GO:0007155)                                  | 848                            | 172  | 90.01    | +          | 1.91            | 1.28E-13    | 1.06E-10 |

|                                                                      |       |      |         |   |      |          |          |
|----------------------------------------------------------------------|-------|------|---------|---|------|----------|----------|
| cell differentiation (GO:0030154)                                    | 3582  | 489  | 380.23  | + | 1.29 | 2.43E-08 | 5.55E-06 |
| regulation of cell differentiation (GO:0045595)                      | 1592  | 240  | 168.99  | + | 1.42 | 3.67E-07 | 6.09E-05 |
| positive regulation of cell differentiation (GO:0045597)             | 938   | 156  | 99.57   | + | 1.57 | 4.08E-07 | 6.63E-05 |
| cell morphogenesis involved in differentiation (GO:0000904)          | 579   | 102  | 61.46   | + | 1.66 | 6.29E-06 | 5.90E-04 |
| neuron differentiation (GO:0030182)                                  | 1086  | 167  | 115.28  | + | 1.45 | 1.10E-05 | 9.69E-04 |
| leukocyte differentiation (GO:0002521)                               | 397   | 72   | 42.14   | + | 1.71 | 6.70E-05 | 4.31E-03 |
| cell morphogenesis involved in neuron differentiation (GO:0048667)   | 449   | 79   | 47.66   | + | 1.66 | 6.87E-05 | 4.39E-03 |
| regulation of cell communication (GO:0010646)                        | 3243  | 499  | 344.24  | + | 1.45 | 4.93E-16 | 9.73E-13 |
| regulation of localization (GO:0032879)                              | 2870  | 466  | 304.65  | + | 1.53 | 1.31E-18 | 1.03E-14 |
| regulation of biological quality (GO:0065008)                        | 3879  | 589  | 411.75  | + | 1.43 | 3.70E-18 | 1.94E-14 |
| regulation of response to stimulus (GO:0048583)                      | 3913  | 589  | 415.36  | + | 1.42 | 2.02E-17 | 7.97E-14 |
| regulation of signaling (GO:0023051)                                 | 3255  | 501  | 345.51  | + | 1.45 | 4.20E-16 | 9.45E-13 |
| biological regulation (GO:0065007)                                   | 12583 | 1533 | 1335.67 | + | 1.15 | 2.15E-15 | 3.76E-12 |
| positive regulation of biological process (GO:0048518)               | 6225  | 842  | 660.78  | + | 1.27 | 1.25E-14 | 1.97E-11 |
| system development (GO:0048731)                                      | 4186  | 602  | 444.34  | + | 1.35 | 3.61E-14 | 5.18E-11 |
| multicellular organism development (GO:0007275)                      | 4801  | 674  | 509.62  | + | 1.32 | 4.39E-14 | 5.77E-11 |
| biological adhesion (GO:0022610)                                     | 858   | 175  | 91.08   | + | 1.92 | 5.08E-14 | 6.16E-11 |
| regulation of cell migration (GO:0030334)                            | 944   | 187  | 100.2   | + | 1.87 | 8.03E-14 | 7.92E-11 |
| response to chemical (GO:0042221)                                    | 3492  | 517  | 370.67  | + | 1.39 | 7.72E-14 | 8.12E-11 |
| cellular response to chemical stimulus (GO:0070887)                  | 2409  | 383  | 255.71  | + | 1.5  | 7.65E-14 | 8.62E-11 |
| regulation of signal transduction (GO:0009966)                       | 2824  | 434  | 299.76  | + | 1.45 | 1.01E-13 | 9.33E-11 |
| developmental process (GO:0032502)                                   | 5576  | 761  | 591.89  | + | 1.29 | 1.10E-13 | 9.63E-11 |
| localization (GO:0051179)                                            | 4976  | 691  | 528.2   | + | 1.31 | 1.57E-13 | 1.24E-10 |
| positive regulation of multicellular organismal process (GO:0051240) | 1595  | 275  | 169.31  | + | 1.62 | 1.90E-13 | 1.42E-10 |

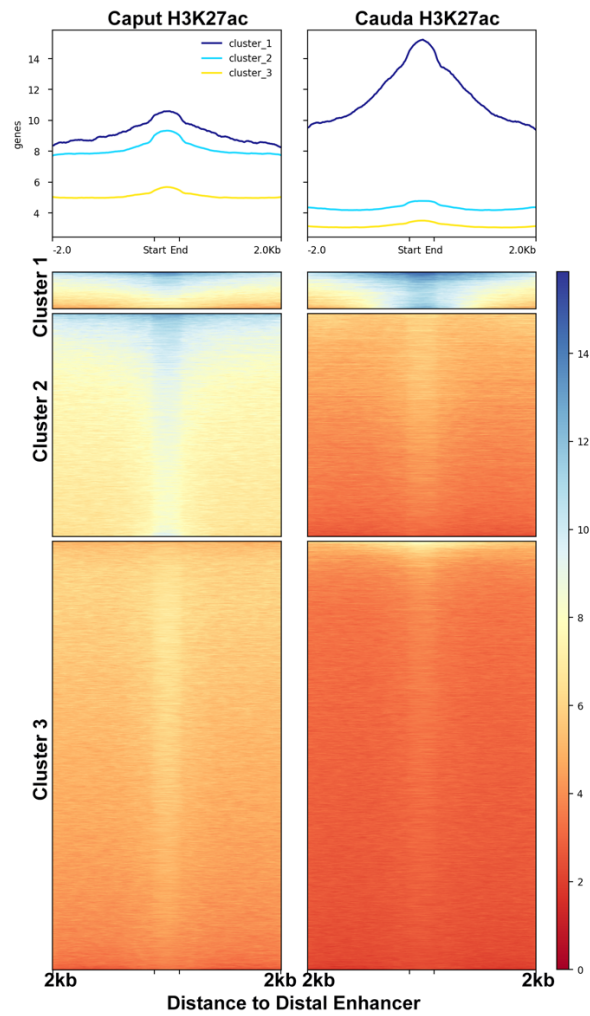

**Supplemental Figure 3a** Heatmaps displaying the enrichment of H3K27ac signals across regions with a distal enhancer-like signature.

**Supplemental Figure 3b.** Genomic distribution (top) and top 25 Go Pathways (below) for Cluster 1, CpG Islands exhibiting increased H3K27ac enrichment in cauda-derived sperm.

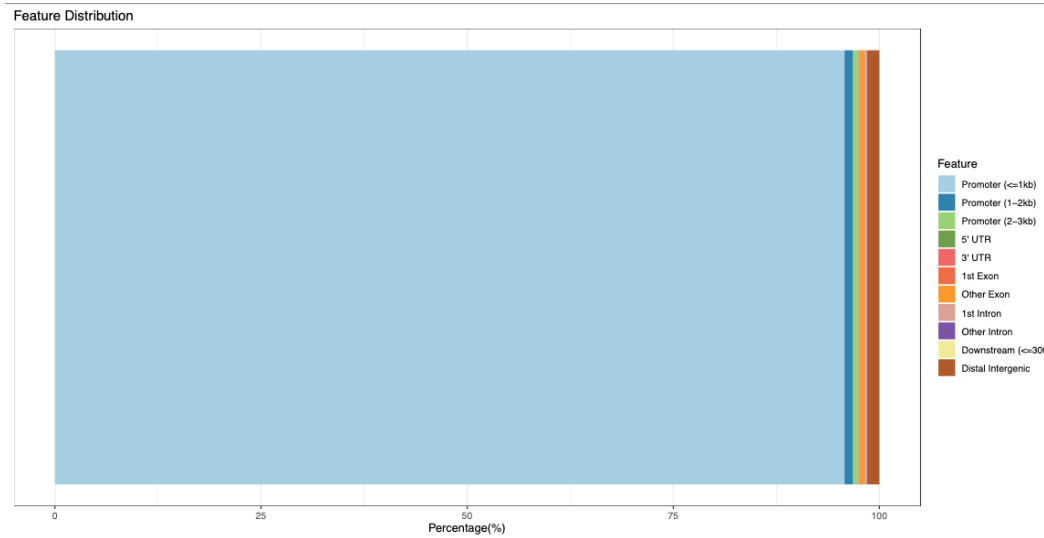

| GO biological process complete                                  | Mus musculus - REFLIST (21988) | upload_1 (2439) | upload_1 (expected) | upload_1 (over/under) | upload_1 (fold Enrichment) | upload_1 (raw P-value) | upload_1 (FDR) |
|-----------------------------------------------------------------|--------------------------------|-----------------|---------------------|-----------------------|----------------------------|------------------------|----------------|
| histone modification (GO:0016570)                               | 335                            | 94              | 37.16               | +                     | 2.53                       | 2.03E-13               | 2.46E-11       |
| embryo development (GO:0009790)                                 | 1201                           | 202             | 133.22              | +                     | 1.52                       | 7.12E-08               | 4.75E-06       |
| embryo development ending in birth or egg hatching (GO:0009792) | 832                            | 149             | 92.29               | +                     | 1.61                       | 1.60E-07               | 1.00E-05       |
| regulation of histone modification (GO:0031056)                 | 165                            | 46              | 18.3                | +                     | 2.51                       | 3.47E-07               | 2.07E-05       |
| sexual reproduction (GO:0019953)                                | 895                            | 148             | 99.28               | +                     | 1.49                       | 1.09E-05               | 5.11E-04       |
| spermatogenesis (GO:0007283)                                    | 586                            | 104             | 65                  | +                     | 1.6                        | 1.94E-05               | 8.61E-04       |
| chromatin remodeling (GO:0006338)                               | 143                            | 35              | 15.86               | +                     | 2.21                       | 8.18E-05               | 3.15E-03       |



|                                                             |      |      |        |   |      |          |          |
|-------------------------------------------------------------|------|------|--------|---|------|----------|----------|
| histone lysine methylation<br>(GO:0034968)                  | 65   | 21   | 7.21   | + | 2.91 | 8.49E-05 | 3.26E-03 |
| regulation of histone acetylation<br>(GO:0035065)           | 58   | 18   | 6.43   | + | 2.8  | 3.97E-04 | 1.24E-02 |
| histone H4 acetylation<br>(GO:0043967)                      | 54   | 17   | 5.99   | + | 2.84 | 4.98E-04 | 1.49E-02 |
| rRNA processing (GO:0006364)                                | 202  | 42   | 22.41  | + | 1.87 | 5.13E-04 | 1.52E-02 |
| reproductive process (GO:0022414)                           | 1480 | 210  | 164.17 | + | 1.28 | 7.56E-04 | 2.06E-02 |
| negative regulation of histone<br>modification (GO:0031057) | 47   | 15   | 5.21   | + | 2.88 | 9.31E-04 | 2.45E-02 |
| embryonic organ morphogenesis<br>(GO:0048562)               | 326  | 59   | 36.16  | + | 1.63 | 1.05E-03 | 2.71E-02 |
| forebrain development<br>(GO:0030900)                       | 385  | 67   | 42.71  | + | 1.57 | 1.10E-03 | 2.83E-02 |
| positive regulation of histone<br>methylation (GO:0031062)  | 45   | 14   | 4.99   | + | 2.8  | 1.66E-03 | 4.00E-02 |
| response to stress (GO:0006950)                             | 3231 | 418  | 358.4  | + | 1.17 | 1.66E-03 | 4.00E-02 |
| blastocyst development<br>(GO:0001824)                      | 151  | 32   | 16.75  | + | 1.91 | 1.74E-03 | 4.14E-02 |
| male gamete generation<br>(GO:0048232)                      | 607  | 107  | 67.33  | + | 1.59 | 1.99E-05 | 8.79E-04 |
| cellular metabolic process<br>(GO:0044237)                  | 6410 | 1139 | 711.02 | + | 1.6  | 1.40E-66 | 2.21E-62 |
| cellular macromolecule metabolic<br>process (GO:0044260)    | 3960 | 810  | 439.26 | + | 1.84 | 3.52E-64 | 2.77E-60 |
| nitrogen compound metabolic<br>process (GO:0006807)         | 5748 | 1027 | 637.59 | + | 1.61 | 2.74E-58 | 1.44E-54 |
| macromolecule metabolic process<br>(GO:0043170)             | 5357 | 973  | 594.22 | + | 1.64 | 3.71E-57 | 1.46E-53 |
| primary metabolic process<br>(GO:0044238)                   | 6288 | 1084 | 697.49 | + | 1.55 | 2.00E-55 | 6.31E-52 |
| cellular protein metabolic process<br>(GO:0044267)          | 2863 | 607  | 317.58 | + | 1.91 | 1.23E-49 | 2.77E-46 |

### Supplemental Figure 4.

Genomic distribution (top) and top 25 Go Pathways (below) for Cluster 1, Enhancer-Like Sequences exhibiting increased H3K27ac enrichment in cauda-derived sperm.

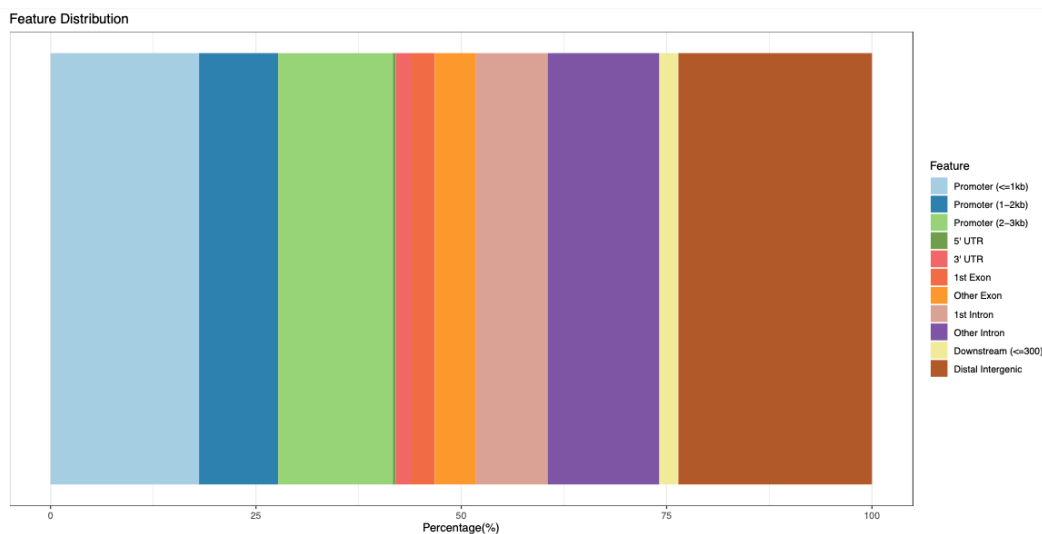

| GO biological process complete                                  | Mus musculus - REFLIST (21988) | upload_1 (1697) | expected | over/under | fold Enrichment | raw P-value | FDR      |
|-----------------------------------------------------------------|--------------------------------|-----------------|----------|------------|-----------------|-------------|----------|
| embryo development (GO:0009790)                                 | 1201                           | 210             | 92.69    | +          | 2.27            | 4.89E-25    | 1.24E-22 |
| pattern specification process (GO:0007389)                      | 457                            | 101             | 35.27    | +          | 2.86            | 3.89E-18    | 7.14E-16 |
| embryonic morphogenesis (GO:0048598)                            | 627                            | 133             | 48.39    | +          | 2.75            | 2.85E-22    | 6.24E-20 |
| head development (GO:0060322)                                   | 705                            | 145             | 54.41    | +          | 2.66            | 4.72E-23    | 1.09E-20 |
| central nervous system development (GO:0007417)                 | 878                            | 172             | 67.76    | +          | 2.54            | 4.23E-25    | 1.09E-22 |
| tube development (GO:0035295)                                   | 958                            | 183             | 73.94    | +          | 2.48            | 1.19E-25    | 3.13E-23 |
| embryo development ending in birth or egg hatching (GO:0009792) | 832                            | 152             | 64.21    | +          | 2.37            | 8.34E-20    | 1.62E-17 |
| negative regulation of RNA biosynthetic process (GO:1902679)    | 1249                           | 228             | 96.4     | +          | 2.37            | 1.76E-29    | 5.43E-27 |

|                                                                                 |      |     |        |   |      |          |          |
|---------------------------------------------------------------------------------|------|-----|--------|---|------|----------|----------|
| positive regulation of nucleic acid-templated transcription (GO:1903508)        | 1505 | 274 | 116.15 | + | 2.36 | 1.31E-35 | 7.66E-33 |
| positive regulation of transcription, DNA-templated (GO:0045893)                | 1505 | 274 | 116.15 | + | 2.36 | 1.31E-35 | 7.38E-33 |
| positive regulation of RNA biosynthetic process (GO:1902680)                    | 1506 | 274 | 116.23 | + | 2.36 | 1.41E-35 | 7.65E-33 |
| lens induction in camera-type eye (GO:0060235)                                  | 7    | 5   | 0.54   | + | 9.25 | 9.70E-04 | 2.09E-02 |
| negative regulation of apoptotic process involved in morphogenesis (GO:1902338) | 7    | 5   | 0.54   | + | 9.25 | 9.70E-04 | 2.09E-02 |
| neuron fate determination (GO:0048664)                                          | 9    | 5   | 0.69   | + | 7.2  | 2.17E-03 | 3.99E-02 |
| forebrain regionalization (GO:0021871)                                          | 27   | 15  | 2.08   | + | 7.2  | 9.81E-08 | 6.11E-06 |
| cardiac chamber formation (GO:0003207)                                          | 12   | 6   | 0.93   | + | 6.48 | 1.17E-03 | 2.40E-02 |
| neuron fate commitment (GO:0048663)                                             | 74   | 37  | 5.71   | + | 6.48 | 6.27E-16 | 1.06E-13 |
| neuron fate specification (GO:0048665)                                          | 31   | 15  | 2.39   | + | 6.27 | 3.87E-07 | 2.17E-05 |
| embryonic forelimb morphogenesis (GO:0035115)                                   | 36   | 17  | 2.78   | + | 6.12 | 8.60E-08 | 5.38E-06 |
| neural tube patterning (GO:0021532)                                             | 43   | 16  | 3.32   | + | 4.82 | 2.57E-06 | 1.22E-04 |
| embryonic cranial skeleton morphogenesis (GO:0048701)                           | 51   | 16  | 3.94   | + | 4.06 | 1.52E-05 | 6.19E-04 |
| embryonic eye morphogenesis (GO:0048048)                                        | 36   | 11  | 2.78   | + | 3.96 | 3.88E-04 | 9.78E-03 |
| embryonic heart tube development (GO:0035050)                                   | 87   | 24  | 6.71   | + | 3.57 | 8.80E-07 | 4.53E-05 |
| embryonic pattern specification (GO:0009880)                                    | 70   | 17  | 5.4    | + | 3.15 | 1.28E-04 | 3.96E-03 |
| embryonic digit morphogenesis (GO:0042733)                                      | 71   | 17  | 5.48   | + | 3.1  | 1.48E-04 | 4.44E-03 |
| post-embryonic development (GO:0009791)                                         | 124  | 28  | 9.57   | + | 2.93 | 3.37E-06 | 1.56E-04 |

**Supplemental Figure 5.**

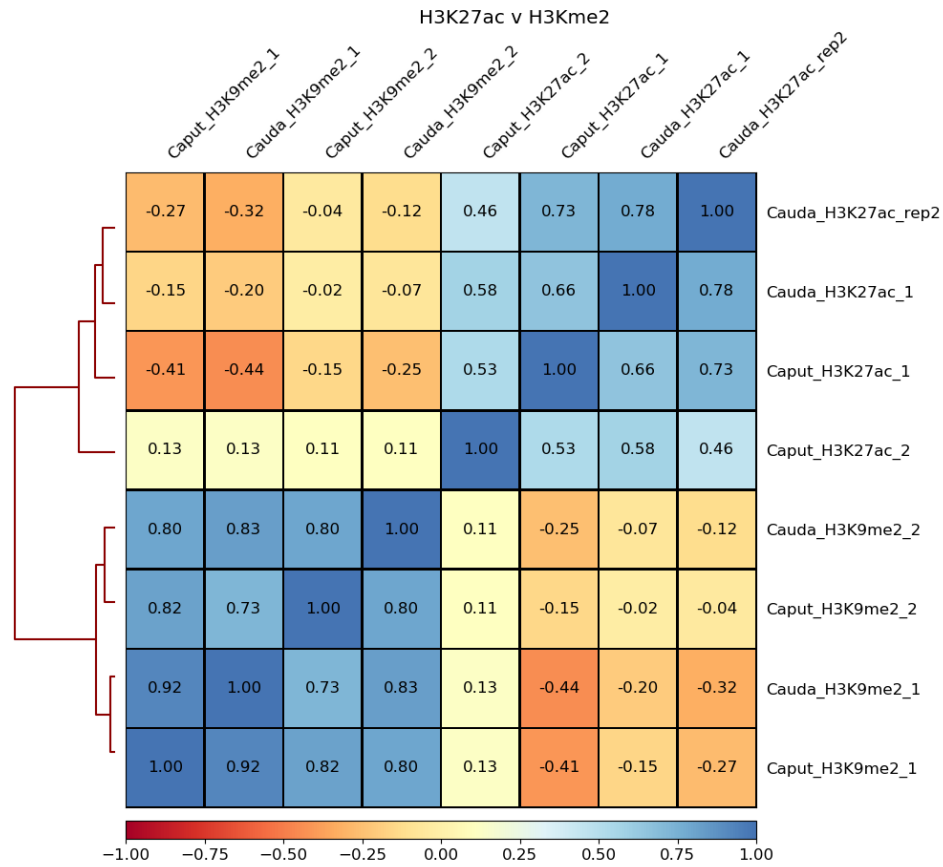

**Supplemental Figure 5.** Comparison of H3K9me2 and H3K27ac genomic localization reveals mutually exclusive patterns of enrichment. Correlation analysis between H3K9me2 and H3K27ac ChIP-seq signals derived from sperm isolated from the caput and cauda regions of the epididymis (n=2).
